# Supplementary material
Source: Springer Nature journal article supplement (https://www.springermedizin.de/resource/supplementary/12991_2008_977_MOESM1_ESM.pdf/9615512)
Supplement: MOESM1 [file 9615512]

| <b>Hospital/Facility</b>                                                                                                                                                                                                                                                                                                                                                                                                                                                                                                                                                              | <b>Location</b>                                                                                                                                                                                                                                                                                                                                                                                                                                                                                                                                            | <b>Services provided</b>                                                                                                                                                                                                                                                                                                                                                                                                                        |
|---------------------------------------------------------------------------------------------------------------------------------------------------------------------------------------------------------------------------------------------------------------------------------------------------------------------------------------------------------------------------------------------------------------------------------------------------------------------------------------------------------------------------------------------------------------------------------------|------------------------------------------------------------------------------------------------------------------------------------------------------------------------------------------------------------------------------------------------------------------------------------------------------------------------------------------------------------------------------------------------------------------------------------------------------------------------------------------------------------------------------------------------------------|-------------------------------------------------------------------------------------------------------------------------------------------------------------------------------------------------------------------------------------------------------------------------------------------------------------------------------------------------------------------------------------------------------------------------------------------------|
| <p><b>National level</b><br/>1. Kenyatta National Hospital</p> <p style="text-align: center;">↑</p> <p><b>Provincial level</b><br/>2. Embu Provincial Hospital</p> <p style="text-align: center;">↑</p> <p><b>District level</b><br/>3. Kiambu District Hospital<br/>4. Kajiado District Hospital</p> <p style="text-align: center;">↑</p> <p><b>Sub-district level</b><br/>5. Naivasha Sub-district Hospital<br/>6. Makindu Sub-district Hospital</p> <p style="text-align: center;">↑</p> <p><b>Health centre level</b><br/>7. Karuri Health Centre<br/>8. Kibera Health Centre</p> | <p>1. Located in Nairobi city, referral national hospital</p> <p>2. Located north-west of Nairobi, urban agricultural setting</p> <p>3. Located north of Nairobi, rural agricultural setting</p> <p>4. Located south of Nairobi, rural pastoralist setting</p> <p>5. Located west of Nairobi, rural pastoralist setting</p> <p>6. Located east of Nairobi, rural agricultural/pastoralist setting</p> <p>7. Located in the northern part of Nairobi, urban low density population</p> <p>8. Located in the western part of Nairobi, urban slum setting</p> | <p>1. All services provided<br/>All doctors are specialists</p> <p>2. All services provided<br/>Newly appointed doctors</p> <p>3 &amp; 4. All services provided<br/>Five or more doctors, 1 or 2 specialists</p> <p>5 &amp; 6. Limited services provided<br/>Generally 5 or less doctors, usually few specialists</p> <p>7 &amp; 8. Primary health care reproductive services<br/>No doctors, mainly served by nurses and clinical officers</p> |
